# Supplementary material
Source: Springer Nature journal article supplement (https://springermedizin.de/resource/supplementary/12931_2012_1253_MOESM6_ESM.pdf/9425832)

### TNSS, evening

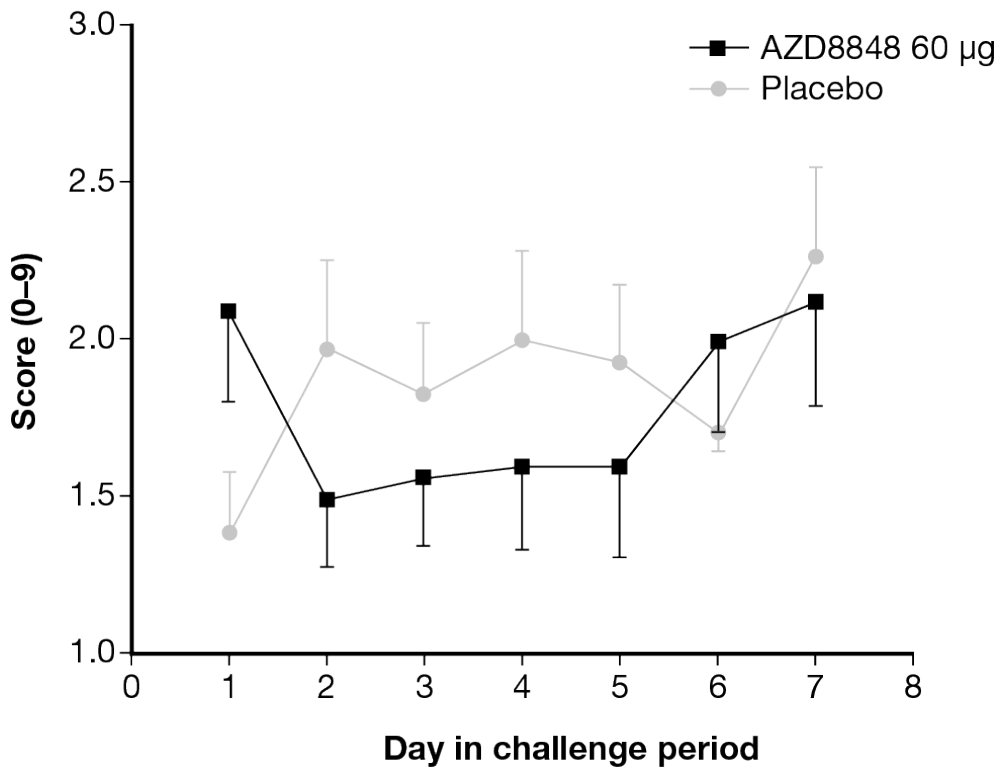

### TNSS, morning

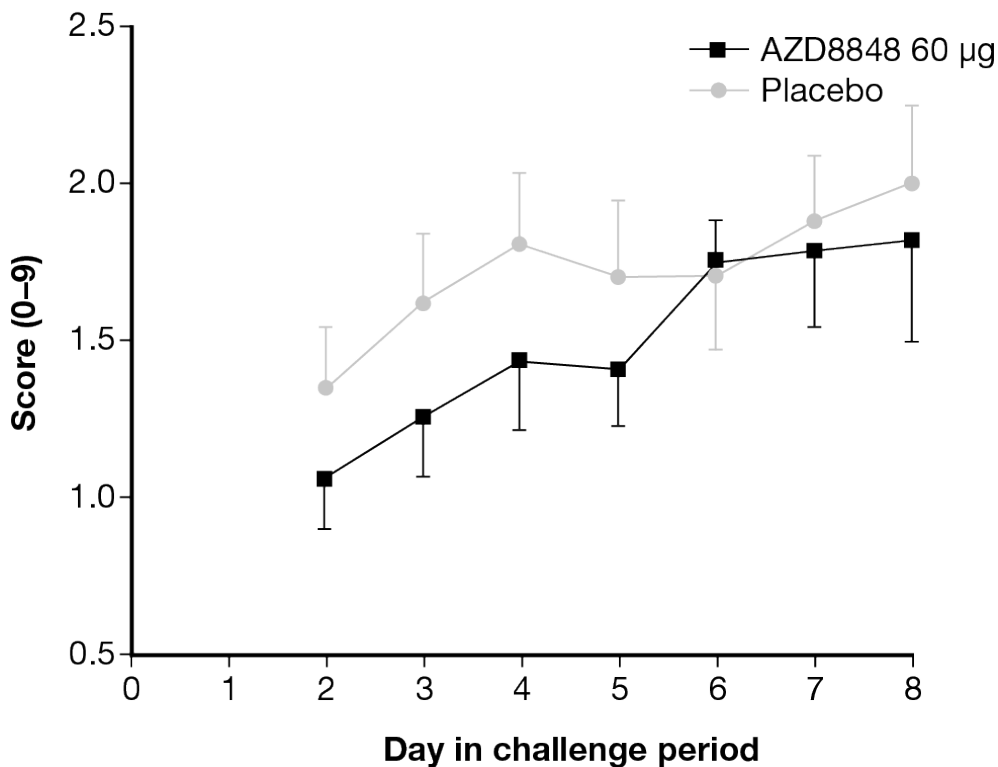

Supplement: MOESM6 [file 9425832]
